# Supplementary material for: Viral Population Diversity during Co-Infection of Foot-And-Mouth Disease Virus Serotypes SAT1 and SAT2 in African Buffalo in Kenya
Source: MDPI journal article supplement (doi:10.3390/v14050897), 2022-04-25

**Table S1.** African buffalo metadata. Rows in bold refer to animals found to be co-infected with SAT1 and SAT2 FMDV viruses via qRT-PCR and deep sequencing. The age of the animals are in years.

| Animal ID | Date Collected | Age        | Sex      | Buffalo herd ID | SAT Serotype   | Sequence name                                                    |
|-----------|----------------|------------|----------|-----------------|----------------|------------------------------------------------------------------|
| 5         | 1/8/2016       | 3.5        | F        | LODRU3          | 1              | 5/Kenya/8Jan2016/SAT1                                            |
| <b>6</b>  |                | <b>2.5</b> | <b>F</b> |                 | <b>1 and 2</b> | <b>6/Kenya/8Jan2016/SAT1</b><br><b>6/Kenya/8Jan2016/SAT2</b>     |
| 7         |                | 2          | F        |                 | 1              | 7/Kenya/8Jan2016/SAT1                                            |
| 8         |                | 1.5        | M        |                 | 1              | 8/Kenya/8Jan2016/SAT1                                            |
| 10        |                | 4          | F        |                 | 1              | 10/Kenya/8Jan2016/SAT1                                           |
| 12        | 1/10/2016      | 3          | F        | GRANTS4         | 2              | 12/Kenya/10Jan2016/SAT2                                          |
| 13        |                | 3          | F        |                 | 2              | 13/Kenya/10Jan2016/SAT2                                          |
| 14        |                | 0.7        | M        |                 | 2              | 14/Kenya/10Jan2016/SAT2                                          |
| 18        |                | 1.5        | F        |                 | 2              | 18/Kenya/10Jan2016/SAT2                                          |
| 19        |                | 2.5        | M        |                 | 2              | 19/Kenya/10Jan2016/SAT2                                          |
| 20        |                | 2.5        | F        |                 | 2              | 20/Kenya/10Jan2016/SAT2                                          |
| 23        |                | 2.5        | M        |                 | 2              | 23/Kenya/10Jan2016/SAT2                                          |
| 25        | 1/11/2016      | 3.5        | F        | LODRU5          | 1              | 25/Kenya/11Jan2016/SAT1                                          |
| 26        |                | 2          | M        |                 | 1              | 26/Kenya/11Jan2016/SAT1                                          |
| 27        |                | 5          | F        |                 | 1              | 27/Kenya/11Jan2016/SAT1                                          |
| 28        |                | 4          | F        |                 | 1              | 28/Kenya/11Jan2016/SAT1                                          |
| 31        |                | 7          | M        |                 | 1              | 31/Kenya/11Jan2016/SAT1                                          |
| 32        |                | 2          | F        |                 | 1              | 32/Kenya/11Jan2016/SAT1                                          |
| 34        | 1/12/2016      | 3.5        | M        | GRANTS4         | 2              | 34/Kenya/12Jan2016/SAT2                                          |
| 35        |                | 7          | M        |                 | 2              | 35/Kenya/12Jan2016/SAT2                                          |
| <b>36</b> |                | <b>5</b>   | <b>F</b> |                 | <b>1 and 2</b> | <b>36/Kenya/12Jan2016/SAT1</b><br><b>36/Kenya/12Jan2016/SAT2</b> |
| 37        |                | 6          | F        |                 | 1              | 37/Kenya/12Jan2016/SAT1                                          |
| 38        |                | 4          | F        |                 | 1              | 38/Kenya/12Jan2016/SAT1                                          |
| 41        |                | 1.5        | F        |                 | 2              | 41/Kenya/12Jan2016/SAT2                                          |
| 42        |                | 1.5        | F        |                 | 2              | 42/Kenya/12Jan2016/SAT2                                          |
| 43        |                | 7          | M        |                 | 2              | 43/Kenya/12Jan2016/SAT2                                          |
| 46        |                | 6          | M        |                 | 2              | 46/Kenya/12Jan2016/SAT2                                          |
| 48        |                | 5          | F        |                 | 1              | 48/Kenya/12Jan2016/SAT1                                          |
| 50        |                | 10         | F        |                 | 2              | 50/Kenya/12Jan2016/SAT2                                          |
| <b>51</b> |                | <b>4</b>   | <b>F</b> |                 | <b>1 and 2</b> | <b>51/Kenya/12Jan2016/SAT1</b><br><b>51/Kenya/12Jan2016/SAT2</b> |
| 54        |                | 4          | M        |                 | 2              | 54/Kenya/12Jan2016/SAT2                                          |
| 55        |                | 4          | F        |                 | 1              | 55/Kenya/12Jan2016/SAT1                                          |
| 56        |                | 4          | F        |                 | 2              | 56/Kenya/12Jan2016/SAT2                                          |
| 58        |                | 8          | M        |                 | 2              | 58/Kenya/12Jan2016/SAT2                                          |
| <b>59</b> |                | <b>4.5</b> | <b>M</b> |                 | <b>1 and 2</b> | <b>59/Kenya/12Jan2016/SAT1</b><br><b>59/Kenya/12Jan2016/SAT2</b> |
| 60        | 1/13/2016      | 3.5        | F        | SCOTTS6         | 2              | 60/Kenya/13Jan2016/SAT2                                          |
| <b>61</b> |                | <b>2</b>   | <b>M</b> |                 | <b>1 and 2</b> | <b>61/Kenya/13Jan2016/SAT1</b><br><b>61/Kenya/13Jan2016/SAT2</b> |
| 62        |                | 3          | M        |                 | 2              | 62/Kenya/13Jan2016/SAT2                                          |
| 63        |                | 4.5        | F        |                 | 2              | 63/Kenya/13Jan2016/SAT2                                          |
| 65        |                | 2.5        | F        |                 | 2              | 65/Kenya/13Jan2016/SAT2                                          |
| 67        | 1/13/2016      | 6          | M        | MORANI7         | 2              | 67/Kenya/13Jan2016/SAT2                                          |
| 69        |                | 4.5        | F        |                 | 2              | 69/Kenya/13Jan2016/SAT2                                          |
| 71        |                | 2          | F        |                 | 2              | 71/Kenya/13Jan2016/SAT2                                          |
| 72        |                | 5          | M        |                 | 1              | 72/Kenya/13Jan2016/SAT1                                          |
| 73        | 1/13/2016      | 5          | M        | MORANI8         | 1              | 73/Kenya/13Jan2016/SAT1                                          |
| 74        |                | 1.5        | F        |                 | 2              | 74/Kenya/13Jan2016/SAT2                                          |
| 75        |                | 6          | M        |                 | 2              | 75/Kenya/13Jan2016/SAT2                                          |
| 76        |                | 2.5        | M        |                 | 2              | 76/Kenya/13Jan2016/SAT2                                          |
| 80        | 1/13/2016      | 3          | M        | ZEBRA PLAINS9   | 2              | 80/Kenya/13Jan2016/SAT2                                          |
| 81        |                | 3          | F        |                 | 2              | 81/Kenya/13Jan2016/SAT2                                          |
| 83        |                | 3          | M        |                 | 2              | 83/Kenya/13Jan2016/SAT2                                          |
| 86        |                | 3.5        | M        |                 | 2              | 86/Kenya/13Jan2016/SAT2                                          |
| 87        |                | 5          | F        |                 | 2              | 87/Kenya/13Jan2016/SAT2                                          |
| 88        |                | 2          | F        |                 | 2              | 88/Kenya/13Jan2016/SAT2                                          |
| K 14      | 1/10/2014      | X          | X        | X               | 1              | K 14/Kenya/10Jan2014/SAT1                                        |
| K 29      | 1/29/2014      | X          | X        | X               | 1              | K 29/Kenya/29Jan2014/SAT1                                        |

**Figure S1.** FMDV VP1 phylogenies with study sequences to determine SAT1 and SAT2 topotypes. Tips highlighted in red squares correspond to the sequences included in this study where A) indicates the SAT1 VP1 phylogeny and B) indicates the SAT2 VP1 phylogeny. Topotypes are designated by vertical blue lines and labeled accordingly.

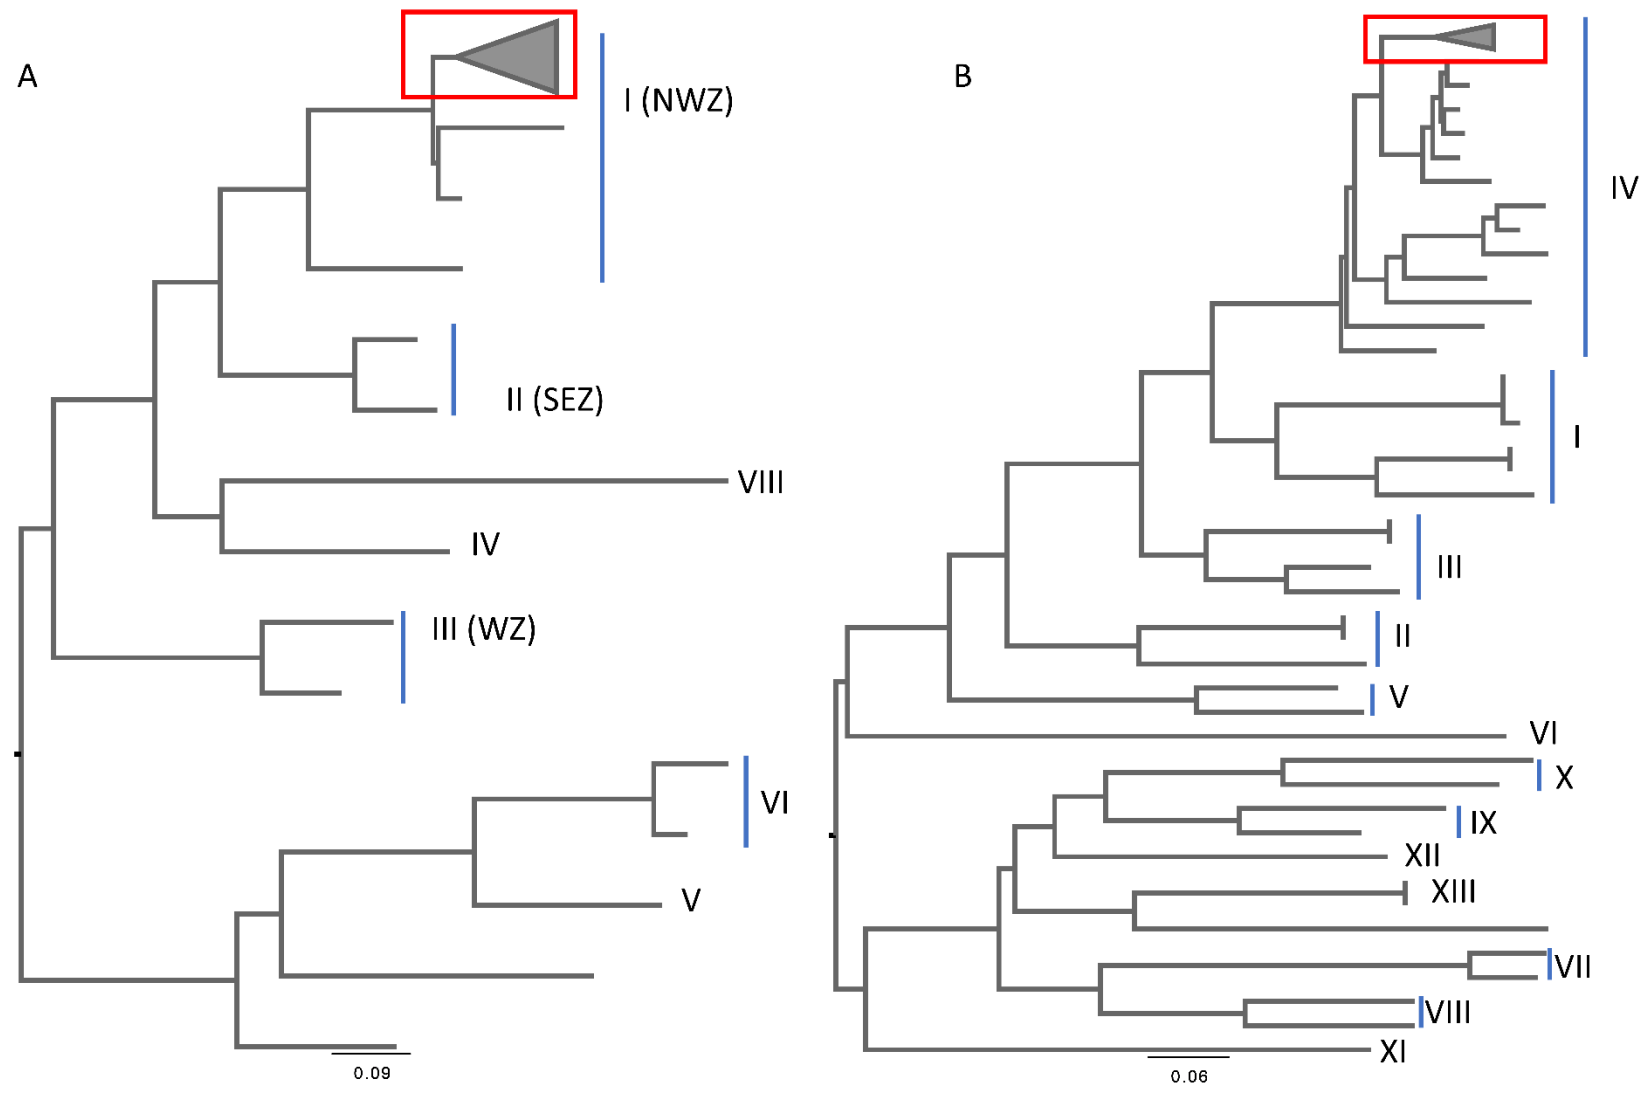

**Figure S2.** Maximum Likelihood Phylogenetic trees of FMDV protein coding regions. All phylogenetic trees were performed using the best-fit model as determined by Mega v10.0 using 500 bootstrap replicates. Branch support is displayed if above 70. For animals 36 and 59, groups of sequences within a serotype are designated by Group 1 (G1) or Group 2 (G2). The first passage sequences are indicated as 'passage.' Regions A) Lpro, B) VP1-VP4, C) 2B-2C, D) 3A-3B and E) 3C-3D were used for the analysis.

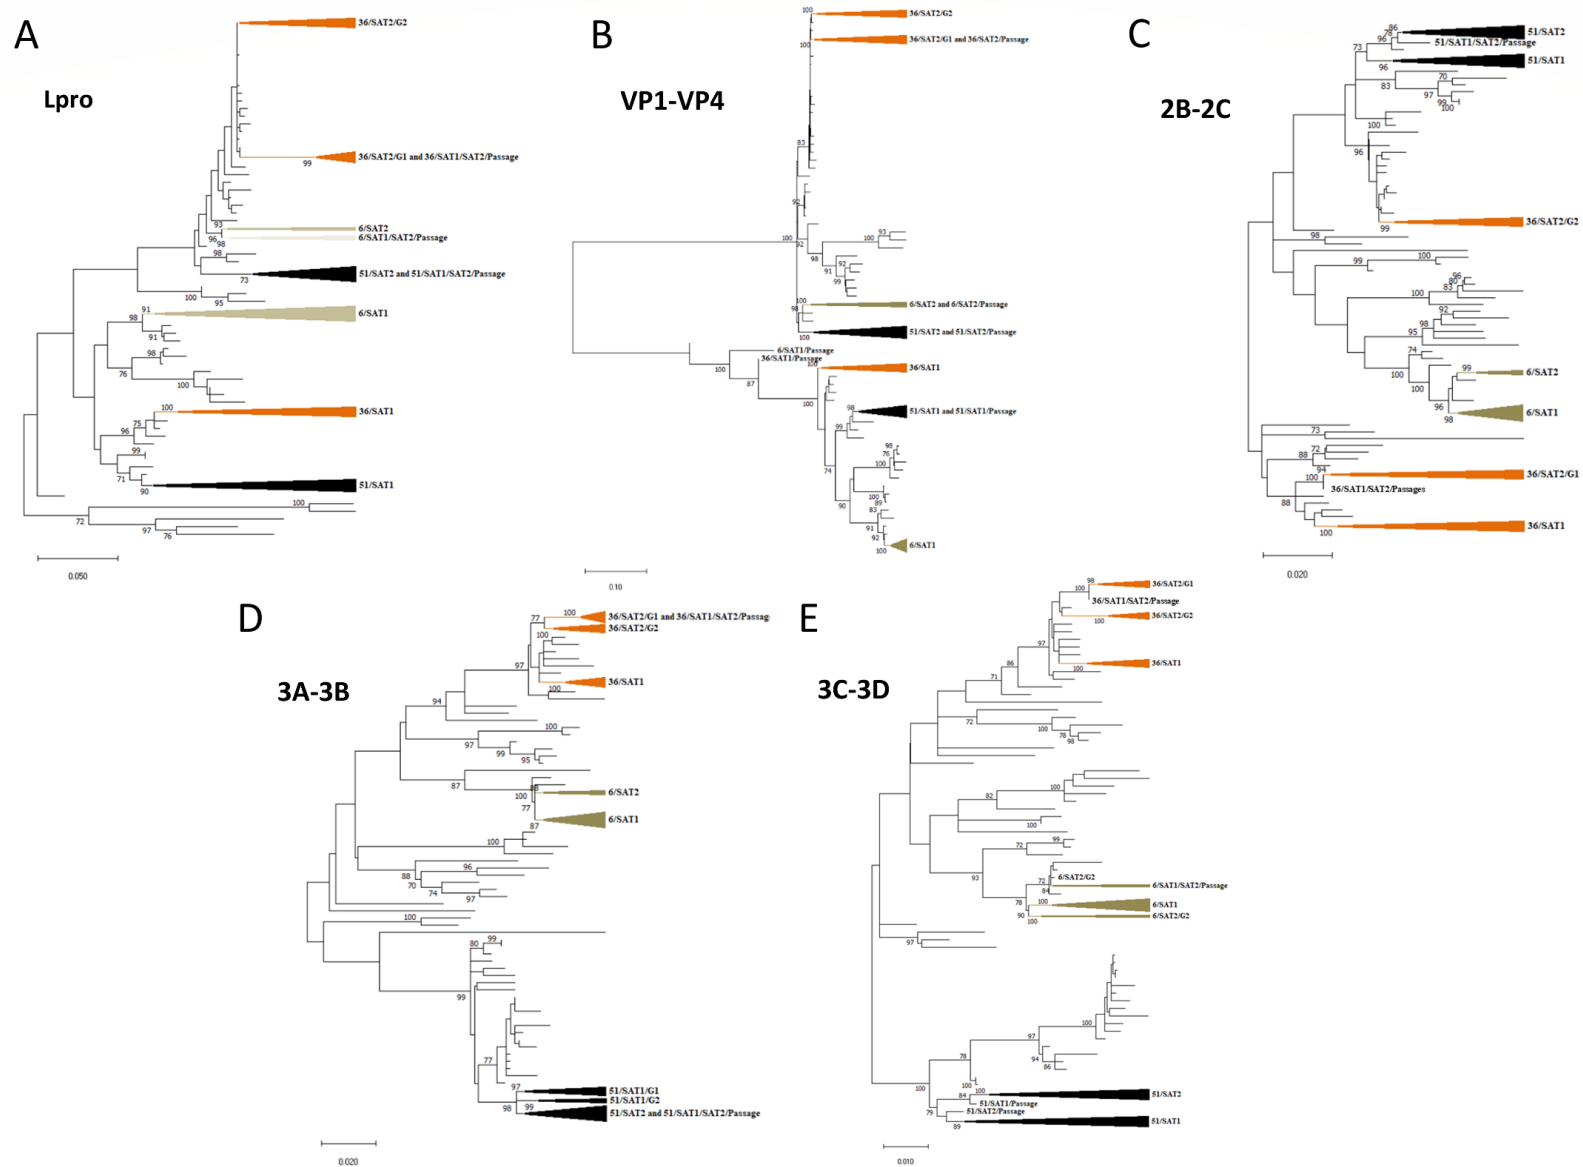

Supplement: s1 [file s1]
